# Supplementary material
Source: Springer Nature journal article supplement (https://www.springerprofessional.de/resource/supplementary/13638_2011_347_MOESM4_ESM.pdf/11897654)
Supplement: MOESM4 [file 11897654]

$query(m, p_{stream}, p_i, served\_SS, D)$

$$q_m^i = \arg \max_r [(p_{stream} \sum_{served\_SS[n]=0} U(r - r_{m,n}) - rp_i)];$$

for  $n=1$  to  $N$ ,

if  $q_m^i \geq r_{m,n}$  then  $served\_SS\_new[n]=1$ ;

else  $served\_SS\_new[n]=served\_SS[n]$ ;

end if;

end for;

for  $m'=1$  to  $M$ ,

if  $q_m^i \geq r_{m,m'}$  then  $D_{new}[m'] \leftarrow 1$ ;

else  $D_{new}[m'] \leftarrow D[m']$ ;

end if;

end for;

return ( $q_m^i, served\_SS\_new, D_{new}$ );
